# Supplementary material for: Impact of rare and common genetic variation in the interleukin-1 pathway on human cytokine responses
Source: PubMed Central journal article supplement (PMC8145796; doi:10.1186/s13073-021-00907-w), 2021-05-25
Supplement: 13073_2021_907_MOESM2_ESM.pdf [file 13073_2021_907_MOESM2_ESM.pdf]

A.

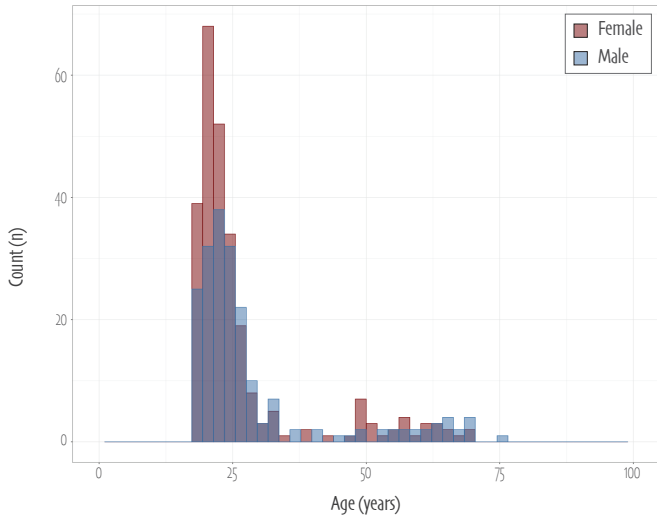

B.

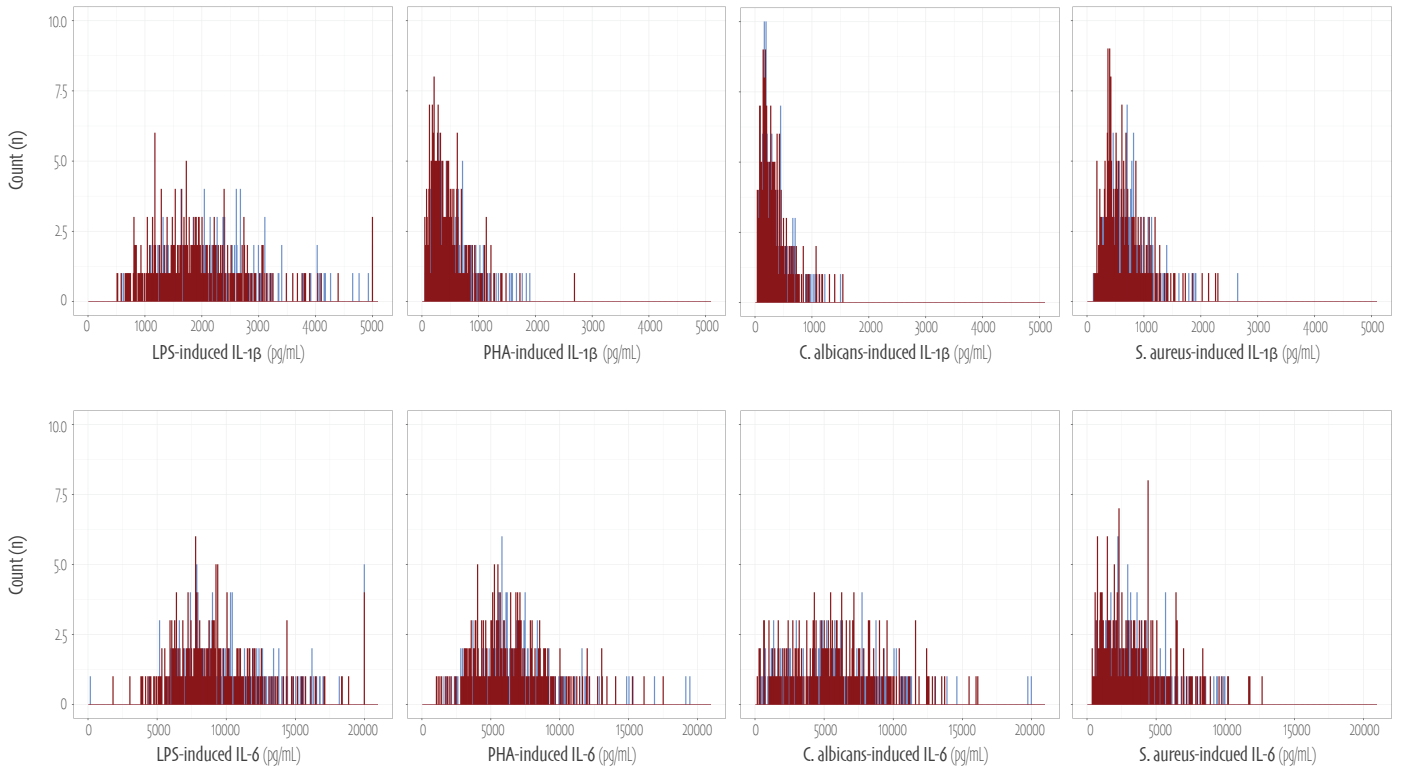

Fig. S1: Baseline characteristics of healthy individuals (n=463) included in analysis. (A) Shows the age distribution of all individuals included in analyses classified by gender (mean age - Female=26.66, Male=28.84; median age - Female=22, Male=24). (B) Shows the IL-1 $\beta$  and IL-6 in vitro cytokine production in response to LPS (100ng/mL), PHA (10 $\mu$ g/mL), *C. albicans* (10<sup>6</sup> CFU/mL), *S. aureus* (1x10<sup>6</sup>/mL), classified by gender.

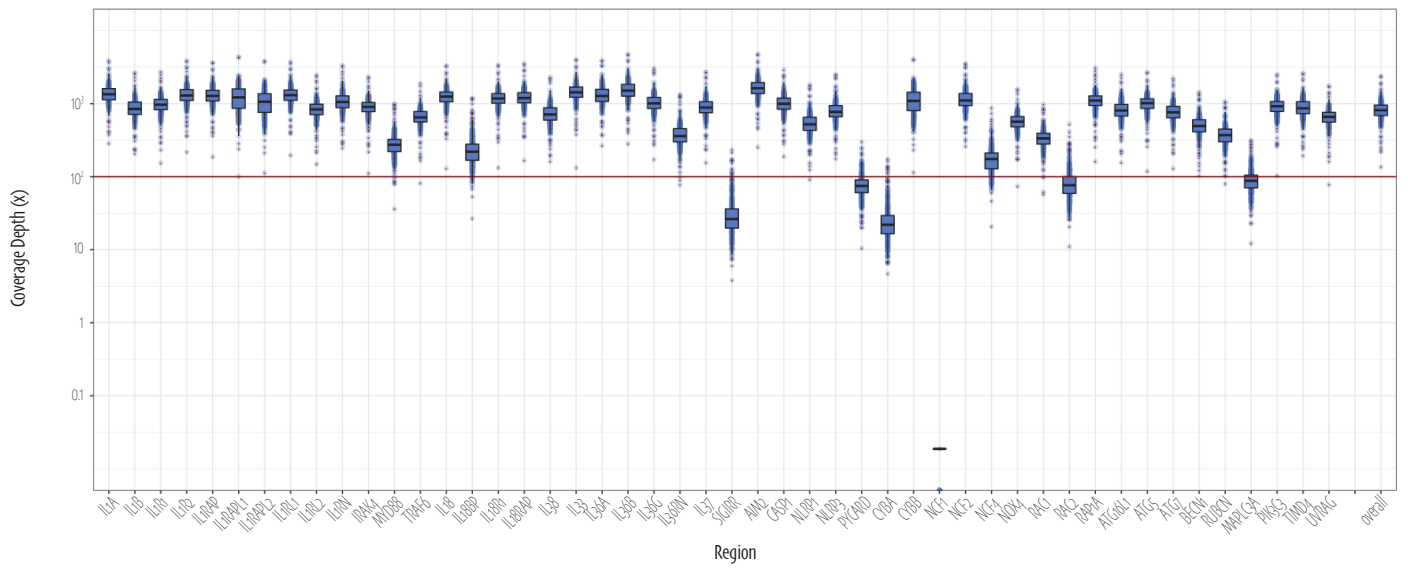

**Fig. S2: Average coverage depth for healthy individuals (n=463) included in analysis.** The average coverage for each individual per gene (and overall on the most right) is visualized in separate jitter plots, overlaid by boxplots, where boxes contain a median line, edges at 25<sup>th</sup> and 75<sup>th</sup> percentile, and default whiskers (1.5 \* InterQuartileRange). Logarithmic y-axis, with a horizontal red line representing the analysis inclusion coverage cut-off of 100x.

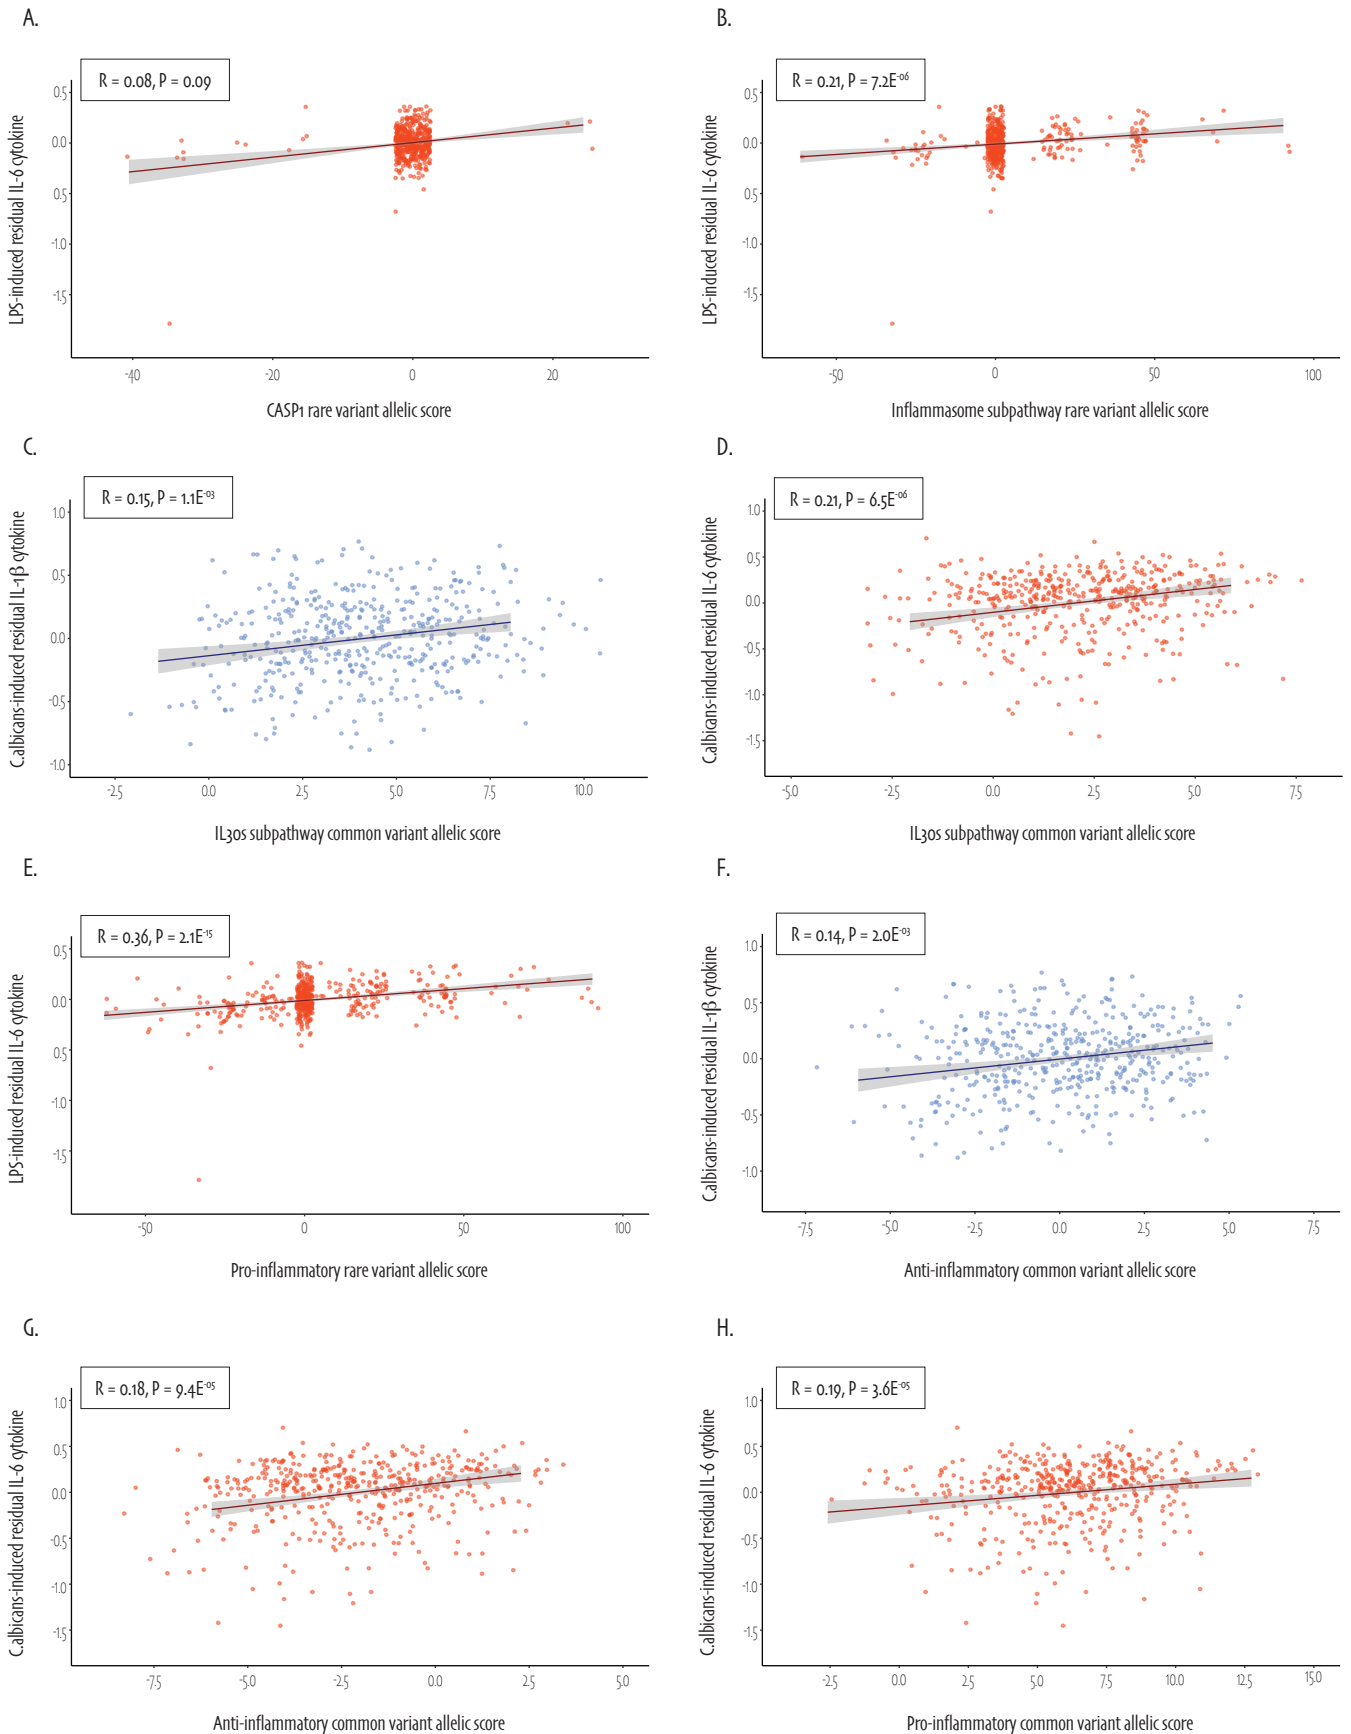

**Fig. S3: Correlation plots of significantly associated sets.** Stimulation-induced residual (corrected for age and sex) cytokine production in correlation with set-based, directional, allele frequency weighted allelic scores for significant bi-directional rare variant and common variant (variant  $n > 2$ ) associations. **(A)** LPS-induced IL-6 residual cytokine production in correlation with CASP1 rare variant ( $n=5$ ) allelic score. **(B)** LPS-induced IL-6 residual cytokine production in correlation with inflammasome subpathway rare variant ( $n=42$ ) allelic score. **(C)** C. albicans-induced IL-1 $\beta$  residual cytokine production in correlation with IL3os subpathway common variant ( $n=7$ ) allelic score. **(D)** C. albicans-induced IL-6 residual cytokine production in correlation with IL3os subpathway rare variant ( $n=7$ ) allelic score. **(E)** LPS-induced IL-6 residual cytokine production in correlation with pro-inflammatory rare variant ( $n=102$ ) allelic score. **(F)** C. albicans-induced IL-1 $\beta$  residual cytokine production in correlation with anti-inflammatory common variant ( $n=10$ ) allelic score. **(G)** C. albicans-induced IL-6 cytokine production in correlation with anti-inflammatory common variant ( $n=10$ ) allelic score. **(H)** C. albicans-induced IL-6 residual cytokine production in correlation with pro-inflammatory common variant ( $n=16$ ) allelic score.
